# Supplementary material for: Black arsenene as a promising anisotropic sensor with high sensitivity and selectivity: insights from a first-principles investigation
Source: Royal Society of Chemistry journal article supplement (doi:10.1039/c9tc06928c), 2020-01-01
Supplement: c9tc06928c1.pdf [file c9tc06928c1.pdf]

## Supplementary Information

### **Black arsenene as a promising anisotropic sensor with high sensitivity and selectivity: insights from a first-principles investigation**

Jianjun Mao<sup>1</sup> and Yue Chen<sup>1,2,\*</sup>

*<sup>1</sup>Department of Mechanical Engineering, The University of Hong Kong, Pokfulam Road, Hong Kong SAR, China*

*<sup>2</sup>HKU Shenzhen Institute of Research and Innovation, Yuexing 2nd Road, Nanshan, Shenzhen 518057, China*

---

\* Corresponding author. Email: [yuechen@hku.hk](mailto:yuechen@hku.hk)

|                                             |                       |           |   |   |       |       |   |       |
|---------------------------------------------|-----------------------|-----------|---|---|-------|-------|---|-------|
| <b>(a) NH<sub>3</sub></b>                   | Initial configuration | Top view  |   |   |       |       |   |       |
|                                             |                       | Side view |   |   |       |       |   |       |
| Configuration after structural optimization | Initial configuration | Top view  |   |   |       |       |   |       |
|                                             |                       | Side view |   |   |       |       |   |       |
| $\Delta E(\text{eV})$                       |                       |           | 0 | 0 | 0.003 | 0.054 | 0 | 0.055 |

|                                             |                       |           |   |       |      |       |      |       |
|---------------------------------------------|-----------------------|-----------|---|-------|------|-------|------|-------|
| <b>(b) CO</b>                               | Initial configuration | Top view  |   |       |      |       |      |       |
|                                             |                       | Side view |   |       |      |       |      |       |
| Configuration after structural optimization | Initial configuration | Top view  |   |       |      |       |      |       |
|                                             |                       | Side view |   |       |      |       |      |       |
| $\Delta E(\text{eV})$                       |                       |           | 0 | 0.001 | 0.01 | 0.038 | 0.05 | 0.088 |

|                                             |                       |           |   |       |       |       |      |       |
|---------------------------------------------|-----------------------|-----------|---|-------|-------|-------|------|-------|
| <b>(c) CO<sub>2</sub></b>                   | Initial configuration | Top view  |   |       |       |       |      |       |
|                                             |                       | Side view |   |       |       |       |      |       |
| Configuration after structural optimization | Initial configuration | Top view  |   |       |       |       |      |       |
|                                             |                       | Side view |   |       |       |       |      |       |
| $\Delta E(\text{eV})$                       |                       |           | 0 | 0.049 | 0.038 | 0.051 | 0.11 | 0.115 |

|                                             |                       |           |   |       |       |      |       |      |
|---------------------------------------------|-----------------------|-----------|---|-------|-------|------|-------|------|
| <b>(d) NO</b>                               | Initial configuration | Top view  |   |       |       |      |       |      |
|                                             |                       | Side view |   |       |       |      |       |      |
| Configuration after structural optimization | Initial configuration | Top view  |   |       |       |      |       |      |
|                                             |                       | Side view |   |       |       |      |       |      |
| $\Delta E(\text{eV})$                       |                       |           | 0 | 0.157 | 0.089 | 0.25 | 0.094 | 0.25 |

| (e) NO <sub>2</sub>                         |           |       |   |       |       |       |       |
|---------------------------------------------|-----------|-------|---|-------|-------|-------|-------|
| Initial configuration                       | Top view  |       |   |       |       |       |       |
|                                             | Side view |       |   |       |       |       |       |
| Configuration after structural optimization | Top view  |       |   |       |       |       |       |
|                                             | Side view |       |   |       |       |       |       |
| $\Delta E(\text{eV})$                       |           | 0.001 | 0 | 0.001 | 0.003 | 0.011 | 0.005 |

**Figure S1** Possible adsorption configurations before and after structural optimizations. Several typical orientations of gas molecules with respect to black arsenene are considered. Relative energy differences ( $\Delta E$ ) with respect to the preferred adsorption configuration are also given for comparison. The green, cyan, pink, red, and brown spheres represent As, N, H, O, and C atoms, respectively.

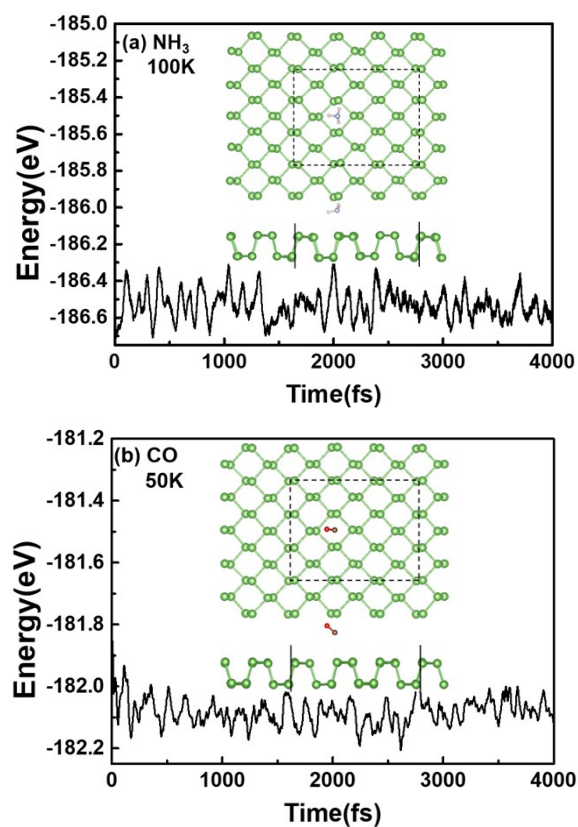

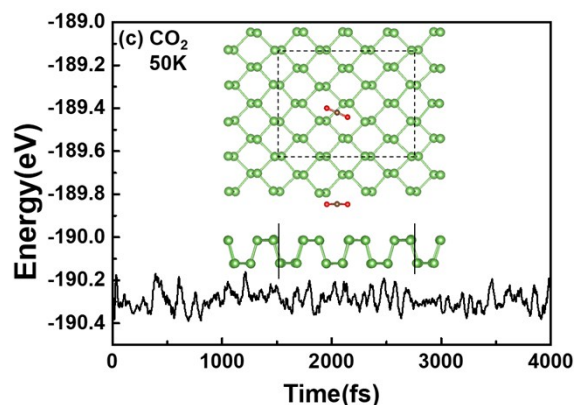

**Figure S2.** Total energy fluctuations of the adsorptions of (a)  $\text{NH}_3$ , (b)  $\text{CO}$ , and (c)  $\text{CO}_2$  on B-As at specific temperatures. Insets are the snapshots of molecular dynamics simulations at 4 ps.

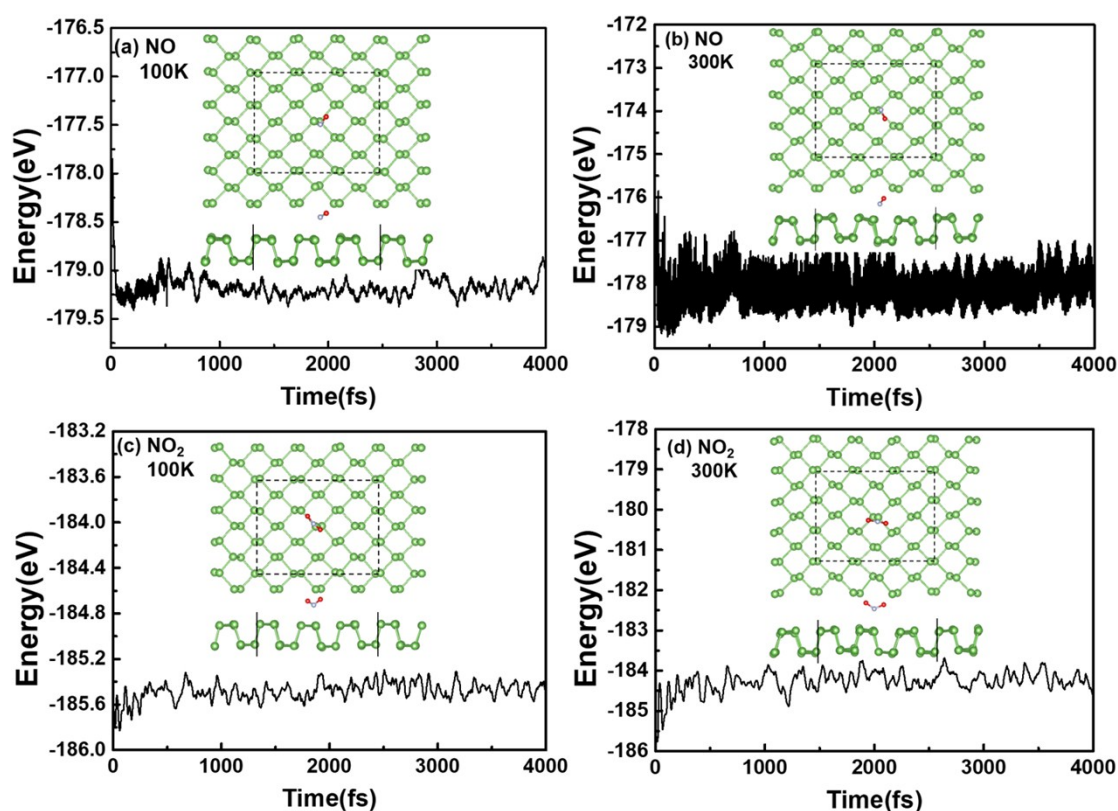

**Figure S3.** Total energy fluctuations of the adsorptions of NO (a, b) and  $\text{NO}_2$  (c, d) on B-As at different temperatures. Insets are the snapshots of molecular dynamics simulations at 4 ps.

Ab-initio molecular dynamics simulations (AIMD) adopting the canonical (NVT) ensemble were performed with a time step of 1 fs for a total simulation time of 4 ps at various temperatures. At low temperatures (e.g., 50 K), all gas molecules can sustain their adsorption positions as shown in Fig. 1 of the manuscript. Higher temperature (e.g., 300 K) may induce desorption of  $\text{CO}$ ,  $\text{CO}_2$ , and  $\text{NH}_3$ , of which the adsorption strengths on B-As are low. However,  $\text{NO}$  and  $\text{NO}_2$ , which have higher adsorption strengths, can still maintain their favor adsorption positions at 300 K (see **Figure S2**

and S3).

**Table S1** Adsorption energies ( $E_{ads}$ ) (eV) corresponding to the most favored configurations as calculated using different vdW correction methods.

|                           | NH <sub>3</sub> | CO    | CO <sub>2</sub> | NO    | NO <sub>2</sub> |
|---------------------------|-----------------|-------|-----------------|-------|-----------------|
| $E_{ads}$ (eV)-<br>vdW-D2 | -0.26           | -0.14 | -0.16           | -0.33 | -0.34           |
| $E_{ads}$ (eV)-<br>vdW-D3 | -0.24           | -0.14 | -0.16           | -0.32 | -0.33           |

From the conventional transition state theory, the recovery time can be expressed as  $\tau = \omega^{-1} \exp(-E_{ad}/k_B T)$ , where  $T$  is temperature,  $k_B$  is Boltzmann's constant, and  $\omega$  is the attempt frequency. If  $\omega$  is taken as  $10^{13} \text{ s}^{-1}$ , the recovery time at room temperature (300 K) of these gas molecules on B-As is estimated.

**Table S2** Recovery time of gas molecules adsorbed on B-As at room temperature.

|               | NH <sub>3</sub>       | CO                    | CO <sub>2</sub>        | NO                    | NO <sub>2</sub>       |
|---------------|-----------------------|-----------------------|------------------------|-----------------------|-----------------------|
| $E_{ad}$ (eV) | -0.26                 | -0.14                 | -0.16                  | -0.33                 | -0.34                 |
| $\tau$ (s)    | $2.33 \times 10^{-9}$ | $2.24 \times 10^{-9}$ | $4.87 \times 10^{-11}$ | $3.49 \times 10^{-8}$ | $5.14 \times 10^{-8}$ |

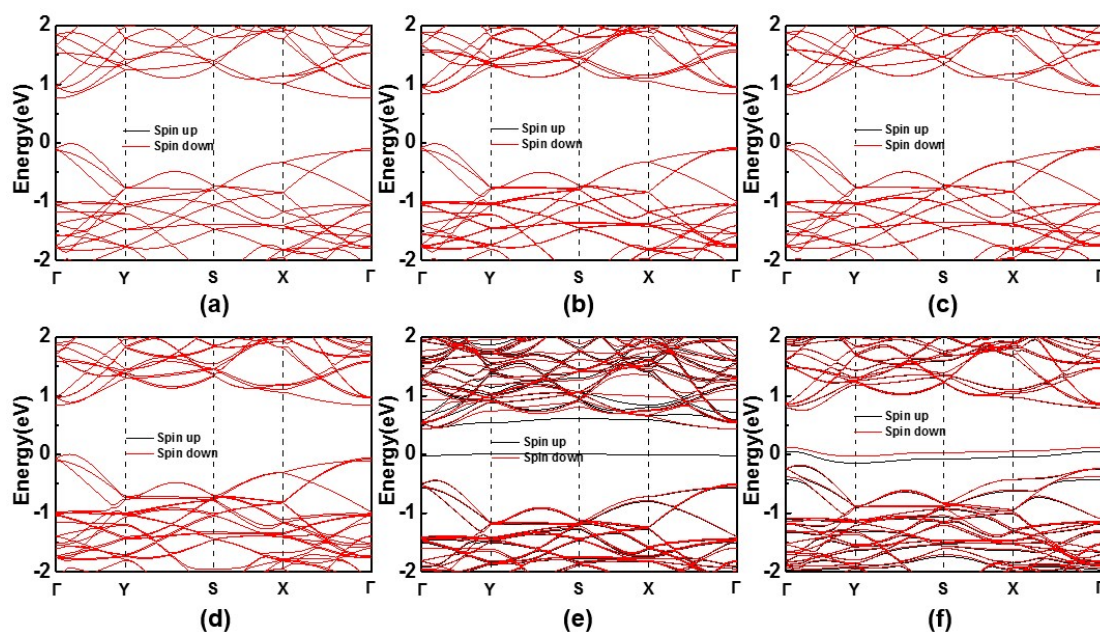

**Figure S4.** Spin-polarized band structures of pure black arsenene (a), and CO (b), CO<sub>2</sub> (c), NH<sub>3</sub> (d), NO (e), and NO<sub>2</sub> (f) adsorbed B-As. Fermi level is located at 0 eV.

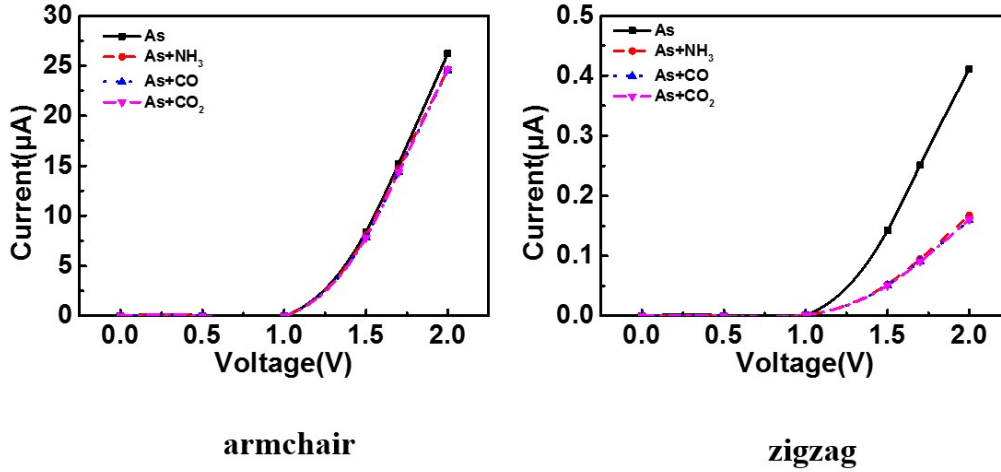

**Figure S5.**  $I$ - $V$  curves (half of total current) of black arsenene before and after the adsorptions of  $\text{NH}_3$ ,  $\text{CO}$ , and  $\text{CO}_2$ .

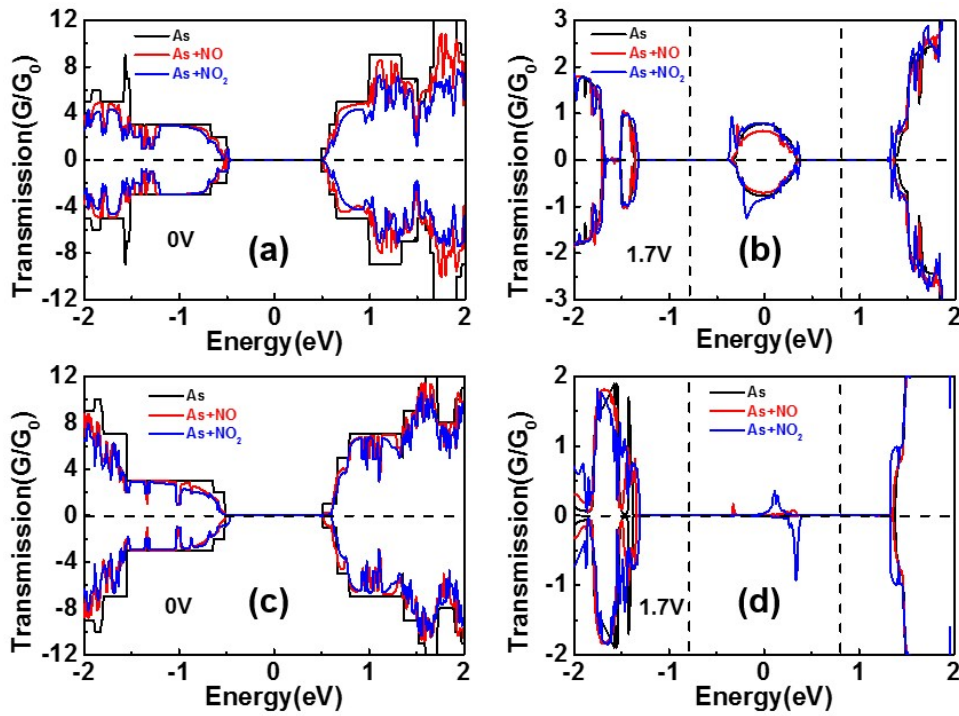

**Figure S6.** Spin-polarized transmission spectra of black arsenene before and after the adsorptions of  $\text{NO}$  and  $\text{NO}_2$  along the armchair (a, b) and zigzag (c, d) directions. The vertical dashed lines in (b) and (d) denote the bias windows.

### Reference

1. Y.H. Zhang, Y.B. Chen, K.G. Zhou, C.H. Liu, J. Zeng, H.L. Zhang and Y. Peng, *Nanotechnology*, 2009, **20**, 185504.
2. A. Kokalj, *Corros. Sci.*, 2013, **68**, 195-203.
